## **Grain Protein Content QTLs Identified in a Durum × Wild Emmer Wheat Mapping Population Tested in Five Environments**

Andrii Fatiukha<sup>1,2</sup>, Itamar Lupo<sup>1,2</sup>, Gabriel Lidzbarsky<sup>1,2</sup>, Valentina Klymiuk<sup>1,2</sup>, Abraham B. Korol<sup>1,2</sup>, Curtis Pozniak<sup>3</sup>, Tzion Fahima<sup>1,2</sup>, Tamar Krugman<sup>1</sup>

<sup>1</sup>Institute of Evolution, University of Haifa, Mt. Carmel, Haifa 31905, Israel.

<sup>2</sup>Department of Evolutionary and Environmental Biology, University of Haifa, Haifa, Israel;  
University of Haifa, Mt. Carmel, Haifa 31905, Israel.

<sup>3</sup>Department of Plant Sciences, University of Saskatchewan, Saskatoon SK S7N 5A8, Canada.

ORCID

Author for correspondence:

*Tzion Fahima*

*Tel: +972-4-8240-784*

*Email: tfahima@evo.haifa.ac.il*

*Tamar Krugman*

*Tel: 972-04-8240783*

*Email: tkrugman@evo.haifa.ac.il*

## Abstract

Wild emmer wheat (*Triticum turgidum* ssp. *dicoccoides*, WEW) was shown to exhibit high grain protein content (GPC) and therefore, possess a great potential for improvement of cultivated wheat nutritional value. A recombinant inbred line (RIL) population derived from a cross between *T. durum* var. Svevo and WEW acc. Y12-3 was used for construction of a high-density genetic map and genetic dissection of GPC. Genotyping of 208 F<sub>6</sub> RILs with 15K wheat SNP array yielded 4,166 polymorphic SNP markers, of which 1,510 were designated as skeleton markers. A total map length of 2,169 cM was obtained with an average distance of 1.5 cM between SNPs. A total of 12 GPC QTLs with LOD score range of 2.7-35.9, and PEV of 2.6-26.6% were identified under five environments. Major QTLs with favorable alleles from WEW were identified on chromosomes 4BS, 5AS, 6BS and 7BL. The QTL region on 6BS coincided with the physical position of the previously cloned QTL, *Gpc-B1*. Comparisons of the physical intervals of the GPC QTLs described here with the results previously reported in other durum×WEW RIL population led to the identification of four common and two homoeologous QTLs. Exploration of the large genetic variation within WEW accessions is a precondition for discovery of exotic beneficial alleles, as we have demonstrated here, by the identification of seven novel GPC QTLs. Therefore, our research emphasizes the importance of GPC QTL dissection in diverse WEW accessions as a source of novel alleles for improvement of GPC in cultivated wheat.

**Key words:** high-density genetic map, QTL analysis, grain protein content, wild emmer wheat, *Gpc-B1*, homoeologous QTLs

## Key message

Genetic dissection of GPC in tetraploid durum × WEW RIL population, based on high-density SNP genetic map, revealed 12 QTLs, with favorable WEW allele for 11 QTLs.

## 1 Introduction

2 Common wheat (*Triticum aestivum* L.) is one of the most important crops with world production of more than 770  
3 million tons harvested over 220 million hectares of land area in 2017 (OECD/FAO 2018). Wheat is a rich source of  
4 carbohydrates, however wheat grains contain rather moderate amount of proteins, which is ranging from 9 to 15%  
5 only (Shewry and Hey 2015). Grain protein content (GPC) shapes the diet nutritional value important for human  
6 health and partially determines the baking properties of bread wheat, as well as the pasta-making characteristics of  
7 durum wheat (*Triticum turgidum* L. subsp. *durum*) (Blanco et al. 2012). Proteins and carbohydrates are the main  
8 components composing grain weight; each has its own limiting environmental conditions, including (i) availability  
9 of utilized nitrogen for protein accumulation, and (ii) sufficient levels of water and sunlight required for CO<sub>2</sub>  
10 fixation and carbohydrate synthesis. Environmental factors (biotic and abiotic) and their interactions with different  
11 genetic backgrounds (genotypes) were shown to affect significantly the total amount and composition of grain  
12 proteins (Triboi-Blondel et al. 2003). Drought is one of the major abiotic stresses, mainly affecting grain  
13 carbohydrate content (Balla et al. 2011), it also plays an important role as a major environmental factor influencing  
14 GPC (Flagella et al. 2010). Global climate change is intensifying the severity of drought around the world and, thus,  
15 requires breeding of crops for adaptation to this environmental stress (Asseng et al. 2014).

16 The evolutionary forces that exerted on natural populations of crop wild relative have shaped their genetic structure  
17 leading to their superior adaptation to various environments including those with water-limited  
18 conditions. Therefore, the exploitation of their rich genetic repertoire has an extensive potential for crop  
19 improvement (Henry and Nevo 2014; Krugman et al. 2018; Klymiuk et al. 2019b). Wild emmer wheat (WEW)  
20 (*Triticum turgidum* L. subsp. *dicoccoides*) is the tetraploid progenitor of both, tetraploid durum and hexaploid  
21 common wheats. WEW germplasm represents a valuable reservoir of genetic variation for drought resistance and  
22 GPC (Huang et al. 2016; Klymiuk et al. 2019a) that may serve as a promising source of favorable alleles for wheat  
23 breeding. One such WEW genotype is Y12-3, that was shown to be resistant to drought (Peleg et al. 2005) and  
24 confer high GPC and mineral content (Peleg et al. 2008). Transcriptomic and metabolomic profiles of this genotype  
25 were extensively studied under terminal drought stress (Krugman et al. 2010, 2011). Y12-3 was used for the  
26 development of the recombinant inbred line (RIL) population used in the current study.

27 *Gpc-B1* is a high GPC QTL, assigned to chromosome arm 6BS, with GPC increasing allele originated from WEW  
28 (Joppa et al. 1997). It was shown to be associated also with increased grain zinc/iron content and earlier leaf  
29 senescence, and to be controlled by the transcription factor *TtNAM-B1* (Uauy et al. 2006). In tetraploid wheat, two  
30 additional copies were found on chromosome arms 6AS (*TtNAM-A1*, an orthologous copy), and chromosome arm  
31 2BS (*TtNAM-B2*, paralogous copy, that is 91% identical to *TtNAM-B1* at the DNA level), while hexaploid wheat  
32 genome contains four *TaNAM* copies (*TaNAM-A1*, *D1*, *B2*, and *D2*; Uauy et al. 2006). WEW allele of *Gpc-B1*  
33 showed positive effects on GPC and other quality traits, and minor impacts on yield related traits, following its  
34 introgression into various wheat backgrounds (Brevis and Dubcovsky 2010; Tabbita et al. 2017).

35 High-throughput single nucleotide polymorphism (SNP) genotyping is a powerful tool that can assist in improving  
36 wheat genetic maps and construction of SNP-based consensus maps of tetraploid (Maccaferri et al. 2015) and  
37 hexaploid wheat (Wang et al. 2014). SNP-based arrays developed for bread wheat (e.g. the 90K and 15K arrays)

38 were proved to be highly efficient also for construction of genetic maps based on WEW as one of the parents,  
39 including studies related to wheat chromosome evolution (Jorgensen et al. 2017), wheat domestication (Nave et al.  
40 2016; Golan et al. 2018), QTL analysis of drought adaptation (Fatiukha et al. 2019a) and nutrient quality of wheat  
41 grains (Fatiukha et al. 2019b). In addition, high-density genetic map of durum Svevo  $\times$  WEW Zavitan (S $\times$ Z) RIL  
42 population (Avni et al. 2014a) served as a base for anchoring of WEW genome assembly scaffolds (Avni et al.  
43 2017). QTL analysis is a suitable approach for genetic dissection of complex traits such as GPC. The use of SNP-  
44 based maps for QTL analysis allows to narrow down the intervals of the detected QTLs compared to previous SSR-  
45 based maps (Fatiukha et al. 2019a) and to compare results obtained from different populations, and can serve as a  
46 powerful tool for marker-assisted selection (MAS) of QTLs during crop breeding programs.  
47 In the current study the RIL population (S $\times$ Y) derived from a cross between durum wheat Svevo and WEW Y12-3  
48 (S $\times$ Y) and genotyped with 15K SNP array, was used for construction of high-density genetic map and further QTL  
49 analysis of GPC. Phenotypic data was obtained from a total of five environments (three locations two of them with  
50 two contrasting water regimes). QTL analysis revealed 12 GPC QTLs, for which 11 favorable QTL alleles were  
51 contributed by WEW. We further used the whole genome assembly of WEW (Avni et al. 2017) for localization of  
52 candidate genes (CGs) associated with GPC, residing within the obtained QTL intervals. In addition, the physical  
53 positions of mapped SNPs and lists of CGs from the QTL intervals were used for identification of common and  
54 homoeologous CGs between the two durum  $\times$  WEW RIL populations.

55

## 56 **Materials and methods**

### 57 **Plant material, growth conditions, and phenotyping**

58 A RIL population (S $\times$ Y) of 208 F<sub>6</sub> lines was derived from the cross between an elite durum cultivar Svevo (Arduini  
59 et al. 2006; Maccaferri et al. 2008) and WEW accession Y12-3 (Peleg et al. 2005; Krugman et al. 2010) using the  
60 single seed descend approach. The RIL population was tested under a total of five environments in three sites over 2  
61 years across Israel: i) an open field at Ein-Tamar, during 2013-2014 winter season, (30°56"N, 35°22"E), on calcite  
62 cierzems soil; ii) an open field at Kimaron during 2014-2015 winter season (32°29"N, 35°30"E), on light brown  
63 alluvian and clay-like silt sierzems; iii) water-sheltered green-house at Sharona during 2014-2015 winter season,  
64 (32°43"N, 35°27"E), on rendzina soil. In Ein Tamar (ET) annual rainfall was only 66 mm, therefore additional 430  
65 mm were applied by drip irrigation (in total 496 mm). In Kimaron two water regimes were applied: well-watered  
66 (230 of rain, supplemented with 622 mm by drip irrigation, a total of 852 mm; K\_WW) and water-limited (230 of  
67 rain, supplemented with 208 mm by drip irrigation, a total of 438 mm; K\_WL). In Sharona taking into account high  
68 level of ground water two water regimes were applied: well-watered (supplemented with 448 mm by drip irrigation;  
69 S\_WW) and water-limited (supplemented with 144 mm by drip irrigation; S\_WL). Each of the 208 RILs and  
70 parental lines were represented by four plants in each plot (15x20 cm) with three replicates, considered as an  
71 experimental unit with randomize block design. Grain protein concentrations were measured using Leco N x 5.7  
72 (Leco Corp., St. Joseph, MI) (Am. Assoc. Cereal Chem. Method 46–30).

### 73 **DNA extraction and SNP genotyping**

74 The fresh leaf tissues of the parental genotypes (Svevo and Y12-3) and each of the 208 F<sub>6</sub> RILs were used for DNA  
75 extraction following a standard CTAB protocol (Doyle 1991). DNA was normalized to 50 ng/μl. SNP genotyping  
76 was performed using the Illumina Infinium 15K Wheat platform, developed by TraitGenetics, Gatersleben,  
77 Germany (Muqaddasi et al. 2017), consisting of 12,905 SNPs selected from the wheat 90K array (Wang et al. 2014).

#### 78 **Statistical analysis of phenotypic data**

79 Statistical analysis that included ANOVA and testing for normal distribution was performed using the BioVinci  
80 software (BioTuring, San Diego, CA, USA).

#### 81 **Construction of high-density genetic map**

82 The genetic map was constructed using MultiPoint software, version «UltraDense» (<http://www.multiqtl.com>)  
83 (Ronin et al. 2017). The best candidate skeleton markers representing groups of co-segregating markers with size of  
84  $\geq 2$  were selected using the function "bound together" after filtering for missing data (removing markers with more  
85 than 10% missing data points) and large segregation distortion ( $\chi^2 > 38$ ). The threshold of recombination fraction  
86 (RF=0.2) was applied for clustering of candidate markers into linkage groups (LG). Marker ordering and testing of  
87 the local map stability and monotonicity were performed for each LG (Mester et al. 2003; Korol et al. 2009). The  
88 final number of LGs was reduced to 14, in accordance with the haploid number of chromosomes of tetraploid wheat,  
89 by merging the LGs with minimum pairwise RF values. The correspondence of the mapped markers with those on  
90 the consensus maps of hexaploid (Wang et al. 2014) and tetraploid wheat (Maccaferri et al. 2015) were used for  
91 orientation of each LG in relation to the short (S) and long (L) chromosome arms.

#### 92 **QTL analysis**

93 QTL analysis was performed using the general interval mapping (IM) procedure of MultiQTL software package  
94 (<http://www.multiqtl.com>). Single-QTL and two-linked-QTL models (Korol et al. 2009) were employed for  
95 screening of genetic linkage for GPC in each environment separately. Multi-environment analysis (MEA) was  
96 performed by joint analysis of trait values scored in five environments. After independent analysis for each  
97 chromosome, multiple interval mapping (MIM) was used to reduce the residual variation for each QTL under  
98 consideration, while taking into account QTLs that reside on other chromosomes (Kao et al. 1999). The significance  
99 of the detected QTL effects was tested using 10000 permutation runs. Significant models were further analyzed by  
100 10000 bootstrap runs to estimate the standard error of the QTL effect.

#### 101 **Identification of the physical intervals of QTLs and CGs**

102 The physical positions of SNP markers were obtained by BLAST search of probe sequences (Wang et al. 2014)  
103 against the whole-genome assembly of WEW accession 'Zavitan' (Avni et al. 2017). Annotated gene models of the  
104 'Zavitan' genome assembly (Avni et al. 2017) were used for identification of genes residing within QTL intervals  
105 (1.5 LOD support interval of QTL).

106

## 107 **Results**

### 108 **High-density genetic map**

109 Genotyping of the S×Y RIL population yielded 4,537 segregating SNP markers, out of these, 4,164 SNPs  
110 represented 1,510 unique loci (skeleton markers) were clustered into 14 LGs (Fig. 1). The constructed genetic map

111 covered 2,168.6 cM with approximately equal length for the A (1,091.7 cM) and B genomes (1,076.9 cM) (Table 1,  
112 Table S1). The length of the individual chromosome maps ranged, from 114.2 cM (1A) to 188.5 (5A) and the  
113 number of skeletal markers ranged from 78 (4B) to 148 (2B). In total 117 (4.04%) non-recombinant chromosomes  
114 were observed among  $208 \times 14 = 2,912$  RIL  $\times$  chromosome combinations (Table 2), of which 50 were homogeneous  
115 for the WEW parental alleles and 67 for the durum parental alleles. The highest numbers of non-recombinant  
116 chromosomes were found for chromosomes 1B (28) and the lowest for 7A (2). Genome A showed significant  
117 ( $P \leq 0.05$ ) higher number of non-recombinant chromosomes compare to the B genome. A significant negative  
118 correlation,  $R = -0.78$  ( $P < 0.05$ ), was found between the proportion of non-recombinant chromosomes and the length  
119 of the individual chromosome maps (Fig. S1). A total of 505 (33%) skeletal loci showed significant ( $P \leq 0.05$ )  
120 segregation distortion (Fig. S2), 71 loci in favor of Y12-3 and 434 loci for Svevo. Moreover, an extremely higher  
121 number of these loci was from the B genome than the A genome (351 vs 154). The highest number of distorted  
122 markers (87) was found for chr. 2B, while chr. 4B did not show any distorted marker. More than 93% of the markers  
123 (3882 out of 4164) mapped in the S $\times$ Y population were anchored to the reference genome of tetraploid WEW (Avni  
124 et al., 2017) (Table S1). High collinearity with average rank correlation coefficient of 0.98 was observed between  
125 the genetic and the physical positions of the mapped SNPs (Fig. S3).

#### 126 **GPC of the RIL population**

127 The wild parent Y12-3 showed on average ~42 % higher GPC than Svevo (21.4 vs. 15.1), under all five  
128 environments (ET, K\_WL, K\_WW, S\_WL, and S\_WW) (Table 3), while the RILs exhibited a wide range  
129 (13.9–29.2) under the five environments over 2 years (Fig. 2, Table 3). GPC of parental lines and RILs was lower  
130 under the green-house conditions (S\_WL and S\_WW) compared to the field conditions (ET, K\_WL, and K\_WW).  
131 The highest GPC values for the RILs was obtained under ET (21.8), while the lowest GPC was detected under  
132 S\_WL (17.9) (Fig. 1, Table 3). Transgressive segregation of GPC was obtained for the RIL population only under  
133 K\_WL environment, whereas under other four environments GPC of Svevo was lower than that of RILs (Fig. S4).  
134 GPC values across the five environments approximately fits normal distribution under all environments (Fig. S4).  
135 Analyses of variance (ANOVA) showed highly significant effects ( $P \leq 0.001$ ) for genotype, irrigation regimes, and  
136 environments for GPC (Table 3), while the genotype  $\times$  environment interactions were not significant. Heritability  
137 ( $h^2$ ) calculated across environments was relatively high (0.77) (Table 3).

#### 138 **Identification of GPC QTLs**

139 A total of 12 significant GPC QTLs were detected in the S $\times$ Y RIL population with LOD scores range of 3.6-27.8  
140 and percent of explained variation (PEV) range of 0.6-24.4% (Table 4). Y12-3 allele contributed to increasing of  
141 GPC at 11 QTLs, while Svevo allele contributed only to one (*QGpc.uhw-1B*). Most of the QTLs had significant  
142 effects under all environments, although three QTLs (*QGpc.uhw-5A.2*, *QGpc.uhw-6A*, and *QGpc.uhw-7B.1*) were  
143 significant only under the greenhouse conditions. *QGpc.uhw-4B*, *QGpc.uhw-5A.1*, *QGpc.uhw-6B*, and *QGpc.uhw-*  
144 *7B.2* seems to be major GPC QTLs with the highest LOD scores and relatively high and stable PEV for most of the  
145 environments. Interestingly, seven of the detected QTLs resided on chromosomes of genome A, and only five on  
146 genome B (Table 4).

#### 147 **Candidate gene analysis**

148 The anchoring of the genetically mapped SNP markers into the physical position of WEW Zavitan pseudomolecules  
149 (Table S1) enabled us to define the physical intervals for each QTL (Table 5) and reveal genes residing within each  
150 interval (Table S2). We have estimated the physical intervals of the detected QTLs (1.5 LOD support interval) based  
151 on the proportion between the physical and genetic positions of the SNPs and of QTLs. The physical intervals of  
152 QTLs were ranged from 1.39 to 154.42 Mbp and the number of genes within these intervals varied from 5 to 653  
153 (Table 5, Table S2). Of special interest are genes that are involved in transport and metabolism of nitrogen as  
154 potential CGs (Table S3). We have detected a total of 53 such CGs for the 12 detected QTL intervals (Table S3).  
155 The 20 most promising CGs are presented in Table 6.

### 156 **Comparison of GPC QTLs from two *T. durum* x WEW RIL populations**

157 We have compared the results of the GPC QTL analysis obtained in the current study for the S×Y population with  
158 our previous result obtained for another *T. durum* (Langdon) × WEW (G16-18) population (L×G) (Fatiukha et al.  
159 2019a) in order to identify possible common QTLs based on co-location of QTL physical intervals. A total of 4 out  
160 of 12 QTLs identified in the current study (*QGpc.uhw-5A.1*, *QGpc.uhw-6A*, *QGpc.uhw-6B*, and *QGpc.uhw-7B.2*)  
161 were co-localized with QTLs identified in L×G population (Fig. 3). The major QTLs in both populations coincided  
162 with the position of *Gpc-B1* gene on chromosome 6B. Bearing in mind the allopolyploid nature of wheat genome we  
163 have search for homoeologous QTLs between populations using a list of homologous genes from Avni et al. (2017).  
164 We consider *QGpc.uhw-3A* and *QGpc.uhw-5A.1* in S×Y population as possible homoeologous for 3B.3 and 5B.2  
165 QTLs in L×G population, respectively (Table S2). Interestingly, QTL *QGpc.uhw-5A.1* located on 5AS was co-  
166 localized with QTL 5A.2 and showed potential homoeology with QTL 5B.2 in L×G population.

167

### 168 **Discussion**

169 Increased protein content is one of the major objectives of grain quality improvement in wheat breeding. However,  
170 genetic improvement of wheat cultivars for many traits is limited due to genetic bottleneck (Peng et al. 2011), which  
171 is the result of early domestication events and subsequent selection in favor of yield related traits, thus, improving  
172 GPC requires broadening of wheat genetic diversity. This goal can be achieved by exploitation of wild crop relatives  
173 in breeding programs and genetic dissection of complex traits in order to upgrade food quality (Longin and  
174 Würschum 2016). The rich gene pools of WEW (Krugman et al. 2018; Klymiuk et al. 2019b), emmer wheat *T.*  
175 *dicoccum* (Fedak 2015), and other wild relatives (Alvarez and Guzman 2018) were shown to be promising sources  
176 for genetic improvement of wheat. The detection of chromosomal regions responsible for increasing GPC is the first  
177 step towards this goal, followed by subsequent introgression of favorable alleles, cloning of promising genes, and  
178 revealing the underlying molecular mechanisms. The current study presents the construction of a high-density  
179 genetic map and QTL analysis of GPC for *T. durum*×WEW RIL population that demonstrated a high potential of  
180 WEW gene pool for improvement of wheat quality.

181 Recent advantages in the development of high-throughput SNP genotyping in wheat (Wang et al. 2014; Winfield et  
182 al. 2016) led to a considerable improvement in construction of consensus maps (Wang et al. 2014; Maccaferri et al.  
183 2015). Furthermore, the availability of reference genome assemblies of tetraploid (Avni et al. 2017) and hexaploid  
184 wheat (Appels et al. 2018) made it possible to compare the genetic and physical positions of markers and identify

185 the genes residing within the intervals of interest. The high collinearity of the S×Y genetic map, constructed in the  
186 current study, with wheat consensus maps, as well as with the assembly of WEW pseudomolecules, highlights the  
187 quality and reliability of this map. Furthermore, genotyping of two RIL populations, derived from crosses of *T.*  
188 *durum* x WEW, using the 15K SNP array, resulted in comparable numbers of skeletal markers: 1,369 for L×G  
189 (*Fatiukha et al. 2019a*) and 1,510 for S×Y populations. The total length of the presented genetic map for S×Y (2,168  
190 cM) is slightly longer than the map constructed for the L×G population (1,836 cM), and approximately equal to the  
191 length of the genetic map of the S×Z RIL population (2,111 cM), which is another *T. durum* x WEW cross,  
192 genotyped using the 90K SNP array (*Avni et al. 2014a*). Recent development in bioinformatics pipelines allows  
193 simple conversion of mapped SNPs to competitive allele-specific PCR (KASP) markers (*Uauy et al. 2015*) that can  
194 be used as flanking or even functional molecular markers (*Klymiuk et al. 2019b*), for marker-assisted breeding or  
195 fine mapping of the target QTLs.

196 GPC QTLs were reported previously for each chromosome of tetraploid and hexaploid wheat (*Quraishi et al. 2017*).  
197 Similarly, we detected GPC QTLs in 10 out of 14 chromosomes of tetraploid wheat. Our results showed clear  
198 advantage of WEW alleles for increasing GPC, compared to the corresponding durum allele, although Svevo is  
199 showing above average GPC for elite durum cultivars (*Blanco et al. 2012*). It is important to note that although  
200 WEW genepool was shown to be a valuable source for improving wheat GPC (*Chatzav et al. 2010*), only a few  
201 studies regarding genetic mapping of GPC in WEW were published. Among them, the identification of *Gpc-B1*  
202 QTL (*Joppa et al. 1997*) represents a great example for the exploitation of WEW genepool for GPC improvement,  
203 followed by the cloning of the NAC transcription factor, *NAM-B1*, underlying this QTL (*Uauy et al. 2006*). QTL  
204 analysis of the L×G RIL population revealed 8 loci with WEW alleles that conferred increased GPC, using low-  
205 density SSR-based map (*Peleg et al. 2009*). Further analysis, using high resolution SNP-based map, expanded the  
206 number of loci with contribution of WEW alleles from 8 to 14 (*Fatiukha et al. 2019b*). The identification of common  
207 or meta-QTLs between independent populations can help to improve QTL interval confidence, as demonstrated by  
208 *Quraishi et al. (2017)*, and can be used for confirmation of detected effects in different genetic backgrounds.  
209 Nevertheless, the identification of co-located QTLs among the large number of publications is restricted by the  
210 absence of consensus positions for many of the published markers. In the current study, we were able to compare the  
211 physical QTL intervals, and the CGs that reside there, between the L×G and the S×Y GPC QTL maps, since the  
212 genetic markers were efficiently anchored to the reference Zavitan assembly of WEW. We found four possible  
213 common and two possible homoeologous QTLs between these two populations, as well as seven QTLs from S×Y  
214 population that were novel compared to L×G population. Since these two populations were developed using distant  
215 WEW genotypes, as well as different durum cultivars (*Avni et al. 2014a*), it is possible that the detected WEW  
216 alleles are absent or rare in cultivated wheat gene pool. Interestingly, the major QTLs identified in both populations  
217 were located on chromosome arm 6BS and were co-localized with the putative position of *Gpc-B1*. While the  
218 detected co-locations can be used as confirmation of QTL effects in different genetic backgrounds, such QTLs can  
219 still represent different alleles or even different CGs, conferring higher potential of broadening the GPC allele  
220 repertoire available for wheat improvement by exploitation of WEW genepool.



221 Many potential genes can be associated with GPC due to the complexity of the trait, and therefore, the proposed  
222 CGs should be treated carefully in further studies. Nevertheless, some of the CGs that showed strong functional  
223 association with GPC can be used as a basis for fine mapping, cloning and allele mining analysis. QTL analysis in  
224 RIL populations cannot provide single-gene resolution, however, we have identified two QTLs (*QGpc.uhw-4B* and  
225 *QGpc.uhw-7B.1*) with physical intervals around 1Mbp and only 5 and 23 genes residing within these intervals,  
226 respectively. Only one QTL interval in our study spanned over 154 Mbp that contain 653 genes, thus making it  
227 highly challenging to search for CG within this extremely large chromosome segment. The *Gpc-B1*, a known gene  
228 for increasing GPC in wheat (Tabbita et al. 2017), was found within the interval of a major GPC QTL (*QGpc.uhw-*  
229 *6B*) in the S×Y population. This gene is responsible for more efficient remobilization of nutrients from the senescing  
230 leaves to the grains during filling stage, thus, increasing protein and mineral accumulation in wheat grains (Uauy et  
231 al. 2006). Although, four *Gpc-B1* homoeologous and paralogous (*Gpc-A1*, *Gpc-B1*, *Gpc-A2*, and *Gpc-B2* on chr.  
232 6A, 6B, 2A, and 2B respectively) genes were identified in tetraploid wheat (Uauy et al. 2006) and showed effect on  
233 nutrient remobilization (Avni et al. 2014b), we did not detect copies of this gene within other QTL intervals in the  
234 S×Y population. Interestingly, a major dwarfing gene *Rht-B1* (Pearce et al. 2011) was identified within the shortest  
235 QTL interval with only five CGs. Taking into account that the cultivated parental line Svevo is a semi-dwarf cultivar  
236 carrying the dwarf allele of this gene (De Santis et al. 2018) and Y12-3 is a tall WEW (Peleg et al. 2005), we assume  
237 that this gene may exhibit a strong effect on all agronomical traits. Moreover, other studies in wheat also showed a  
238 possible effect of this gene on GPC, which makes *Rht-B1* a strong CG for the detected QTL (Fowler et al. 2016; Zou  
239 et al. 2017). Members of NRT1/PTR family of proton-coupled transporters, which are involved in nitrogen  
240 metabolism in different plant species (Fang et al. 2013; Naz et al. 2017; Castro-Rodriguez et al. 2017; Corratge-  
241 Faillie and Lacombe 2017) and, hence, influencing protein accumulation, were identified within five QTL intervals  
242 in the S×Y population and were selected as promising CGs. Sulfur metabolism was shown to be an important factor  
243 that can alter nitrogen accumulation (Howarth et al. 2008; Dai et al. 2015; Bonnot et al. 2017), following this idea  
244 glutamate and glutathione related CGs were identified within intervals of seven QTLs in the S×Y population and  
245 also was shown for QTLs in the L×G population (Fatiukha et al. 2019b).

246

## 247 **Conclusions and future perspectives**

248 In the present study, we reported a QTL analysis study of GPC, based on a high-density SNP-based genetic map for  
249 the S×Y (durum×WEW) RIL population. We detected novel GPC QTLs that were not previously reported for  
250 durum×WEW populations and identified potential CGs for each of the 12 detected QTLs. Physical intervals of GPC  
251 QTLs in two durum×WEW populations were used for identification of four common and two homoeologous QTLs  
252 between them. *Gpc-B1* was characterized as a CG for a major GPC QTL confirming that this gene serves as one of  
253 the major sources of variation in GPC for wheat. The obtained results will serve as a basis for future introgression of  
254 favorable WEW alleles into bread and durum wheat, fine mapping, and cloning of promising QTLs.

255 Our results showed an advantage of WEW alleles for increasing GPC that emphasize the high potential of WEW  
256 gene pool for improvement of modern wheat quality.

257

258 **Author contribution statement**

259 A.F., A.B.K., C.P. T.F., and T.K. designed the research; I.L., G.L. performed field experiment and sample  
260 processing; A.F. performed the data analysis; A.F., V.K., T.K., and T.F wrote the manuscript.

261 **Acknowledgements**

262 The research leading to these results has received funding from the European Community's Seventh Framework  
263 Programme (FP7/ 2007-2013) under the grant agreement N°FP7- 613556, Whealbi project; Carmel LTD and  
264 Kaiima Bio-Agritech Ltd, the Israeli Science Foundation (2289/16), and the Israeli field crops organization. We  
265 greatly acknowledge N. Filler, R. Jing-Jun and O. Chernjavaska for their excellent technical assistance.

266

267 **Compliance with ethical standards**

268 **Conflict of interest:** The authors declare that they have no conflict of interest.

269

270 **References**

271

272 Alvarez JB, Guzman C (2018) Interspecific and intergeneric hybridization as a source of variation for wheat grain  
273 quality improvement. *Theor Appl Genet* 131:225–251. doi: 10.1007/s00122-017-3042-x

274 Appels R, Eversole K, Feuillet C, et al (2018) Shifting the limits in wheat research and breeding using a fully  
275 annotated reference genome. *Science* 361:eaar7191. doi: 10.1126/science.aar7191

276 Asseng S, Ewert F, Martre P, et al (2014) Rising temperatures reduce global wheat production. *Nat Clim Chang*  
277 5:143

278 Avni R, Nave M, Barad O, et al (2017) Wild emmer genome architecture and diversity elucidate wheat evolution  
279 and domestication. *Science* 357:93–97. doi: 10.1126/science.aan0032

280 Avni R, Nave M, Eilam T, et al (2014a) Ultra-dense genetic map of durum wheat × wild emmer wheat developed  
281 using the 90K iSelect SNP genotyping assay. *Mol Breed* 34:1549–1562. doi: 10.1007/s11032-014-0176-2

282 Avni R, Zhao R, Pearce S, et al (2014b) Functional characterization of GPC-1 genes in hexaploid wheat. *Planta*  
283 239:313–324. doi: 10.1007/s00425-013-1977-y

284 Balla K, Rakszegi M, Li Z, et al (2011) Quality of Winter Wheat in Relation to Heat and Drought Shock after  
285 Anthesis. *Czech J. Food Sci.* 29: 117–128

286 Blanco A, Mangini G, Giancaspro A, et al (2012) Relationships between grain protein content and grain yield  
287 components through quantitative trait locus analyses in a recombinant inbred line population derived from two  
288 elite durum wheat cultivars. *Mol Breed* 30:79–92. doi: 10.1007/s11032-011-9600-z

289 Bonnot T, Bancel E, Alvarez D, et al (2017) Grain subproteome responses to nitrogen and sulfur supply in diploid  
290 wheat *Triticum monococcum* ssp. *monococcum*. *Plant J* 91:894–910. doi: 10.1111/tpj.13615

291 Carlos Brevis J, Dubcovsky J (2010) Effects of the Chromosome Region Including the Gpc-B1 Locus on Wheat  
292 Grain and Protein. *Crop Sci* 50:93–10

293 Castro-Rodriguez V, Canas RA, de la Torre FN, et al (2017) Molecular fundamentals of nitrogen uptake and

- 294 transport in trees. *J Exp Bot* 68:2489–2500. doi: 10.1093/jxb/erx037
- 295 Chatzav M, Peleg Z, Ozturk L, et al (2010) Genetic diversity for grain nutrients in wild emmer wheat: potential for  
296 wheat improvement. *Ann Bot* 105:1211–1220. doi: 10.1093/aob/mcq024
- 297 Corratge-Faillie C, Lacombe B (2017) Substrate (un)specificity of Arabidopsis NRT1/PTR FAMILY (NPF)  
298 proteins. *J Exp Bot* 68:3107–3113. doi: 10.1093/jxb/erw499
- 299 Dai Z, Plessis A, Vincent J, et al (2015) Transcriptional and metabolic alternations rebalance wheat grain storage  
300 protein accumulation under variable nitrogen and sulfur supply. *Plant J* 83:326–343. doi: 10.1111/tj.12881
- 301 De Santis M, Giuliani M, Giuzio L, et al (2018) Assessment of grain protein composition in old and modern Italian  
302 durum wheat genotypes. *Italian Journal of Agronomy* 13: 40– 43
- 303 Doyle J (1991) DNA Protocols for Plants BT - Molecular Techniques in Taxonomy. In: Hewitt GM, Johnston  
304 AWB, Young JPW (eds). Springer Berlin Heidelberg, Berlin, Heidelberg, pp 283–293
- 305 Fang Z, Xia K, Yang X, et al (2013) Altered expression of the PTR/NRT1 homologue OsPTR9 affects nitrogen  
306 utilization efficiency, growth and grain yield in rice. *Plant Biotechnol J* 11:446–458. doi: 10.1111/pbi.12031
- 307 Fatiukha A, Deblieck M, Klymiuk V, et al (2019a) Genomic architecture of phenotypic plasticity of complex traits  
308 in tetraploid wheat in response to water stress. bioRxiv 565820. doi: 10.1101/565820
- 309 Fatiukha A, Klymiuk V, Peleg Z, et al (2019b) Variation in phosphorus and sulfur content shapes the genetic  
310 architecture and phenotypic associations within wheat grain ionome. bioRxiv 580423. doi: 10.1101/580423
- 311 Fedak G (2015) Alien Introgressions from wild Triticum species, *T. monococcum*, *T. urartu*, *T. turgidum*, *T.*  
312 *dicoccum*, *T. dicoccoides*, *T. carthlicum*, *T. araraticum*, *T. timopheevii*, and *T. miguschovae*. In: Molnár-Láng  
313 M, Ceoloni C, Doležal J (eds) *Alien Introgression in Wheat: Cytogenetics, Molecular Biology, and Genomics*.  
314 Springer International Publishing, Cham, pp 191–219
- 315 Flagella Z, Giuliani MM, Giuzio L, et al (2010) Influence of water deficit on durum wheat storage protein  
316 composition and technological quality. *Eur J Agron* 33:197–207. doi:  
317 <https://doi.org/10.1016/j.eja.2010.05.006>
- 318 Fowler DB, N'Diaye A, Laudencia-Chingcuanco D, Poznaniak CJ (2016) Quantitative Trait Loci Associated with  
319 Phenological Development, Low-Temperature Tolerance, Grain Quality, and Agronomic Characters in Wheat  
320 (*Triticum aestivum* L.). *PLoS One* 11:e0152185
- 321 Golan G, Hendel E, Méndez Espitia GE, et al (2018) Activation of seminal root primordia during wheat  
322 domestication reveals underlying mechanisms of plant resilience. *Plant Cell Environ* 41:755–766. doi:  
323 10.1111/pce.13138
- 324 Henry RJ, Nevo E (2014) Exploring natural selection to guide breeding for agriculture. *Plant Biotechnol J* 12:655–  
325 662. doi: 10.1111/pbi.12215
- 326 Howarth JR, Parmar S, Jones J, et al (2008) Co-ordinated expression of amino acid metabolism in response to N and  
327 S deficiency during wheat grain filling. *J Exp Bot* 59:3675–3689. doi: 10.1093/jxb/ern218
- 328 Huang L, Raats D, Sela H, et al (2016) Evolution and Adaptation of Wild Emmer Wheat Populations to Biotic and  
329 Abiotic Stresses. *Annu Rev Phytopathol* 54:279–301. doi: 10.1146/annurev-phyto-080614-120254
- 330 Joppa LR, Du C, Hart GE, Hareland GA (1997) Mapping Gene(s) for Grain Protein in Tetraploid Wheat (*Triticum*

- 331 turgidum L.) Using a Population of Recombinant Inbred Chromosome Lines. *Crop Sci* 37:1586–1589. doi:  
332 10.2135/cropsci1997.0011183X003700050030x
- 333 Jorgensen C, Luo M-C, Ramasamy R, et al (2017) A High-Density Genetic Map of Wild Emmer Wheat from the  
334 Karaca Dağ Region Provides New Evidence on the Structure and Evolution of Wheat Chromosomes. *Front*  
335 *Plant Sci* 8:1798. doi: 10.3389/fpls.2017.01798
- 336 Kao C-H, B Zeng Z, D Teasdale R (1999) Multiple Interval Mapping for Quantitative Trait Loci. *Genetics*  
337 152:1203–16
- 338 Klymiuk V, Fatiukha A, Fahima T (2019a) Wheat tandem kinases provide insights on disease resistance gene flow  
339 and host-parasite co-evolution. *Plant J.* doi: 10.1111/tpj.14264
- 340 Klymiuk V, Fatiukha A, Huang L, et al (2019b) Durum Wheat as a Bridge Between Wild Emmer Wheat Genetic  
341 Resources and Bread Wheat. In: Miedaner T, Korzun VBT-A of G and GR in C (eds) Woodhead Publishing  
342 Series in Food Science, Technology and Nutrition. Woodhead Publishing, pp 201–230
- 343 Korol A, Mester D, Frenkel Z, Ronin Y (2009) Methods for Genetic Analysis in the Triticeae. In: Feuillet C,  
344 Muehlbauer GJ, editors. *Genetics and genomics of the Triticeae*. New York: Springer Science + Business  
345 Media. pp . pp. 163–199
- 346 Krugman T, Chague V, Peleg Z, et al (2010) Multilevel regulation and signalling processes associated with  
347 adaptation to terminal drought in wild emmer wheat. *Funct Integr Genomics* 10:167–186. doi:  
348 10.1007/s10142-010-0166-3
- 349 Krugman T, Nevo E, Beharav A, et al (2018) The Institute of Evolution Wild Cereal Gene Bank at the University of  
350 Haifa. *Isr J Plant Sci* 65:129–146. doi: <https://doi.org/10.1163/22238980-00001065>
- 351 Krugman T, Peleg Z, Quansah L, et al (2011) Alteration in expression of hormone-related genes in wild emmer  
352 wheat roots associated with drought adaptation mechanisms. *Funct Integr Genomics* 11:565–583. doi:  
353 10.1007/s10142-011-0231-6
- 354 Longin CFH, Würschum T (2016) Back to the Future – Tapping into Ancient Grains for Food Diversity. *Trends*  
355 *Plant Sci* 21:731–737. doi: <https://doi.org/10.1016/j.tplants.2016.05.005>
- 356 Maccaferri M, Ricci A, Salvi S, et al (2015) A high-density, SNP-based consensus map of tetraploid wheat as a  
357 bridge to integrate durum and bread wheat genomics and breeding. *Plant Biotechnol J* 13:648–663. doi:  
358 10.1111/pbi.12288
- 359 Mester D, Ronin Y, Minkov D, et al (2003) Constructing large-scale genetic maps using an evolutionary strategy  
360 algorithm. *Genetics* 165:2269–2282
- 361 Muqaddasi QH, Brassac J, Börner A, et al (2017) Genetic Architecture of Anther Extrusion in Spring and Winter  
362 Wheat. *Front Plant Sci* 8:754. doi: 10.3389/fpls.2017.00754
- 363 Nave M, Avni R, Ben-Zvi B, et al (2016) QTLs for uniform grain dimensions and germination selected during  
364 wheat domestication are co-located on chromosome 4B. *Theor Appl Genet* 129:1303–1315. doi:  
365 10.1007/s00122-016-2704-4
- 366 Naz M, Fan X, Fan X, et al (2017) Plant nitrate transporters: from gene function to application. *J Exp Bot* 68:2463–  
367 2475. doi: 10.1093/jxb/erx011

- 368 OECD/FAO (2018) OECD-FAO Agricultural Outlook 2018-2027 - Special Focus: Middle East and North Africa  
369 Pearce S, Saville R, Vaughan SP, et al (2011) Molecular characterization of Rht-1 dwarfing genes in hexaploid  
370 wheat. *Plant Physiol* 157:1820–1831. doi: 10.1104/pp.111.183657  
371 Peleg Z, Cakmak I, Ozturk L, et al (2009) Quantitative trait loci conferring grain mineral nutrient concentrations in  
372 durum wheat x wild emmer wheat RIL population. *Theor Appl Genet* 119:353–369. doi: 10.1007/s00122-009-  
373 1044-z  
374 PELEG Z, FAHIMA T, ABBO S, et al (2005) Genetic diversity for drought resistance in wild emmer wheat and its  
375 ecogeographical associations. *Plant Cell Environ* 28:176–191. doi: 10.1111/j.1365-3040.2005.01259.x  
376 Peleg Z, Saranga Y, Yazici A, et al (2008) Grain zinc, iron and protein concentrations and zinc-efficiency in wild  
377 emmer wheat under contrasting irrigation regimes. *Plant Soil* 306:57–67. doi: 10.1007/s11104-007-9417-z  
378 Peng JH, Sun D, Nevo E (2011) Domestication evolution, genetics and genomics in wheat. *Mol Breed* 28:281. doi:  
379 10.1007/s11032-011-9608-4  
380 Quraishi UM, Pont C, Ain Q, et al (2017) Combined Genomic and Genetic Data Integration of Major Agronomical  
381 Traits in Bread Wheat (*Triticum aestivum* L.). *Front Plant Sci* 8:1843. doi: 10.3389/fpls.2017.01843  
382 Ronin YI, Mester DI, Minkov DG, et al (2017) Building Ultra-High-Density Linkage Maps Based on Efficient  
383 Filtering of Trustable Markers. *Genetics* 206:1285–1295. doi: 10.1534/genetics.116.197491  
384 Shewry PR, Hey SJ (2015) The contribution of wheat to human diet and health. *Food energy Secur* 4:178–202. doi:  
385 10.1002/fes3.64  
386 Tabbita F, Pearce S, Barneix AJ (2017) Breeding for increased grain protein and micronutrient content in wheat:  
387 Ten years of the GPC-B1 gene. *J Cereal Sci* 73:183–191. doi: <https://doi.org/10.1016/j.jcs.2017.01.003>  
388 Triboi Blondel A, Triboi E, Martre P (2003) Environmentally induced changes in protein composition in  
389 developing grains of wheat are related to changes in total protein content. *J Exp Bot* 54:1731–1742. doi:  
390 10.1093/jxb/erg183  
391 Uauy C, Caccamo M, Ramirez-Gonzalez RH (2015) PolyMarker: A fast polyploid primer design pipeline.  
392 *Bioinformatics* 31:2038–2039. doi: 10.1093/bioinformatics/btv069  
393 Uauy C, Distelfeld A, Fahima T, et al (2006) A NAC Gene regulating senescence improves grain protein, zinc, and  
394 iron content in wheat. *Science* 314:1298–1301. doi: 10.1126/science.1133649  
395 Wang S, Wong D, Forrest K, et al (2014) Characterization of polyploid wheat genomic diversity using a high-  
396 density 90,000 single nucleotide polymorphism array. *Plant Biotechnol J* 12:787–796. doi: 10.1111/pbi.12183  
397 Winfield MO, Allen AM, Burrige AJ, et al (2016) High-density SNP genotyping array for hexaploid wheat and its  
398 secondary and tertiary gene pool. *Plant Biotechnol J* 14:1195–1206. doi: 10.1111/pbi.12485  
399 Zou J, Semagn K, Iqbal M, et al (2017) QTLs associated with agronomic traits in the Attila × CDC Go spring wheat  
400 population evaluated under conventional management. *PLoS One* 12:e0171528  
401  
402

**Table 1** Summary of the genetic map constructed based on S×Y RIL population

| <b>Linkage group</b> | <b>Total markers</b> | <b>Skeletal markers</b> | <b>Co-segregated markers</b> | <b>Length (cM)</b> | <b>Average interval (cM)/locus</b> |
|----------------------|----------------------|-------------------------|------------------------------|--------------------|------------------------------------|
| 1A                   | 230                  | 81                      | 149                          | 114.2              | 1.43                               |
| 1B                   | 381                  | 135                     | 246                          | 137.5              | 1.03                               |
| 2A                   | 240                  | 88                      | 152                          | 178.3              | 2.05                               |
| 2B                   | 423                  | 148                     | 275                          | 183.4              | 1.25                               |
| 3A                   | 254                  | 94                      | 160                          | 153.2              | 1.65                               |
| 3B                   | 365                  | 130                     | 235                          | 163.9              | 1.27                               |
| 4A                   | 162                  | 80                      | 82                           | 153.9              | 1.95                               |
| 4B                   | 169                  | 78                      | 91                           | 119.2              | 1.55                               |
| 5A                   | 287                  | 113                     | 174                          | 188.5              | 1.68                               |
| 5B                   | 408                  | 149                     | 259                          | 178.7              | 1.21                               |
| 6A                   | 310                  | 90                      | 220                          | 129.8              | 1.46                               |
| 6B                   | 358                  | 106                     | 252                          | 141.0              | 1.34                               |
| 7A                   | 295                  | 114                     | 181                          | 173.9              | 1.54                               |
| 7B                   | 284                  | 104                     | 180                          | 153.4              | 1.49                               |
| Group 1              | 611                  | 216                     | 395                          | 251.7              | 1.23                               |
| Group 2              | 663                  | 236                     | 427                          | 361.6              | 1.65                               |
| Group 3              | 619                  | 224                     | 395                          | 317.1              | 1.46                               |
| Group 4              | 331                  | 158                     | 173                          | 273.1              | 1.75                               |
| Group 5              | 695                  | 262                     | 433                          | 367.1              | 1.44                               |
| Group 6              | 668                  | 196                     | 472                          | 270.8              | 1.40                               |
| Group 7              | 579                  | 218                     | 361                          | 327.3              | 1.51                               |
| A genome             | 1778                 | 660                     | 1118                         | 1091.7             | 1.68                               |
| B genome             | 2388                 | 850                     | 1538                         | 1076.9             | 1.30                               |
| <b>Total</b>         | <b>4166</b>          | <b>1510</b>             | <b>2656</b>                  | <b>2168.6</b>      | <b>1.49</b>                        |

**Table 2** Number of RILs with parental (non-recombinant) chromosomes in S×Y RIL population

| Chromosome | Svevo | Y12-3 | Total | % RILs |
|------------|-------|-------|-------|--------|
| 1A         | 14    | 14    | 28    | 13.53  |
| 1B         | 8     | 2     | 10    | 4.83   |
| 2A         | 5     | 1     | 6     | 2.90   |
| 2B         | 2     | 2     | 4     | 1.93   |
| 3A         | 4     | 4     | 8     | 3.86   |
| 3B         | 4     | 2     | 6     | 2.90   |
| 4A         | 5     | 6     | 11    | 5.31   |
| 4B         | 7     | 8     | 15    | 7.25   |
| 5A         | 3     | 1     | 4     | 1.93   |
| 5B         | 2     | 1     | 3     | 1.45   |
| 6A         | 8     | 5     | 13    | 6.28   |
| 6B         | 2     | 1     | 3     | 1.45   |
| 7A         | 1     | 1     | 2     | 0.97   |
| 7B         | 2     | 2     | 4     | 1.93   |
| Genome A   | 40    | 32    | 72    | 4.97   |
| Genome B   | 27    | 18    | 45    | 3.11   |
| Total      | 67    | 50    | 117   | 4.04   |

**Table 3** Analyses of variance (ANOVA), means and ranges for grain protein content (GPC) in S×Y RIL population under five environments.

| Environment | RIL Mean | RIL Range | Svevo        | Y12-3          |
|-------------|----------|-----------|--------------|----------------|
| Ein-Tamar   | 21.8     | 16.3–29.2 | 16.3         | 24.8           |
| Kimaron WL  | 20.2     | 15.6–24.8 | 16.2         | 21.8           |
| Kimaron WW  | 20.2     | 16.4–24.6 | 15.6         | 21.4           |
| Sharona WL  | 17.9     | 13.9–22.6 | 12.9         | 19.5           |
| Sharona WW  | 19.2     | 15.3–25.3 | 14.3         | 19.4           |
| All env.    | 19.8     | 13.9–29.2 | 15.1         | 21.4           |
| MS (gen)    | MS (ir)  | MS (env)  | MS (gen×env) | h <sup>2</sup> |
| 10.36       | 213.46   | 364.35    | 2.42         | 0.77           |
| ***         | ***      | ***       | n.s.         |                |



**Table 4** Summary of the QTLs associated with GPC in S×Y RIL population across five environments.

| Chr. | QTL           | LOD  | Position, cM | Interval, cM | Length, cM | Nearest marker          | Percent of explained variation (PEV) of QTL |      |      |      |      | ITV* allele |
|------|---------------|------|--------------|--------------|------------|-------------------------|---------------------------------------------|------|------|------|------|-------------|
|      |               |      |              |              |            |                         | ET                                          | K_WL | K_WW | S_WL | S_WW |             |
| 1A   | QGpc.uhw-1A   | 6.3  | 75.96        | 72.4—78.4    | 6.0        | TA002402-1350           | 3.0                                         | 0.6  | 3.7  | 4.1  | 1.7  | Y           |
| 1B   | QGpc.uhw-1B   | 5.8  | 102.62       | 101.4—106.6  | 5.2        | RAC875_c818_1185        | 4.1                                         | 4.2  | 6.9  | 6.2  | 2.3  | S           |
| 2A   | QGpc.uhw-2A   | 6.7  | 95.09        | 93.8—96.2    | 2.5        | RAC875_c39665_175       | 5.3                                         | 4.2  | 3.4  | 1.2  | 1.9  | Y           |
| 3A   | QGpc.uhw-3A   | 7.8  | 63.80        | 59.7—65.6    | 5.9        | Excalibur_c6501_477     | 6.5                                         | 3.8  | 3.8  | 1.8  | 1.3  | Y           |
| 4A   | QGpc.uhw-4A   | 8.1  | 35.27        | 33.4—37.9    | 4.5        | BS00022125_51           | 4.2                                         | 2.2  | 6.1  | 0.8  | 1.8  | Y           |
| 4B   | QGpc.uhw-4B   | 26.9 | 30.84        | 30.4—31.4    | 1.0        | TG0010b                 | 13.4                                        | 15.3 | 8.0  | 14.1 | 1.2  | Y           |
| 5A   | QGpc.uhw-5A.1 | 14.2 | 33.27        | 30.0—42.5    | 12.5       | RAC875_rep_c106118_339  | 5.6                                         | 12.2 | 6.3  | 7.0  | 2.3  | Y           |
| 5A   | QGpc.uhw-5A.2 | 3.8  | 122.10       | 118.5—131.0  | 12.5       | Tdurum_contig55097_601  | -/-                                         | -/-  | -/-  | 7.2  | 1.8  | Y           |
| 6A   | QGpc.uhw-6A   | 3.8  | 70.96        | 67.6—89.6    | 22.0       | wsnp_Ex_c15268_23489498 | -/-                                         | -/-  | -/-  | 7.1  | 1.8  | Y           |
| 6B   | QGpc.uhw-6B   | 27.8 | 47.07        | 46.1—48.6    | 2.4        | Tdurum_contig9860_281   | 8.4                                         | 15.9 | 24.4 | 8.7  | 3.7  | Y           |
| 7B   | QGpc.uhw-7B.1 | 3.6  | 8.21         | 6.1—9.5      | 3.5        | Tdurum_contig10861_942  | -/-                                         | -/-  | -/-  | 6.0  | 2.6  | Y           |
| 7B   | QGpc.uhw-7B.2 | 10.7 | 98.33        | 95.3—101.2   | 5.8        | Kukri_c14766_484        | 3.2                                         | 7.0  | 5.0  | 3.5  | 0.8  | Y           |

\* - increase trait value allele (ITV)

**Table 5** Physical intervals and number of genes within GPC QTLs in S×Y RIL population.

| Chr. QTL                | Interval start , Mbp | Interval end , Mbp | Interval length , Mbp | Number of HC genes |
|-------------------------|----------------------|--------------------|-----------------------|--------------------|
| 1A <i>QGpc.uhw-1A</i>   | 514.70               | 519.74             | 5.04                  | 56                 |
| 1B <i>QGpc.uhw-1B</i>   | 645.57               | 650.73             | 5.16                  | 60                 |
| 2A <i>QGpc.uhw-2A</i>   | 527.17               | 558.54             | 31.37                 | 180                |
| 3A <i>QGpc.uhw-3A</i>   | 486.17               | 517.08             | 30.91                 | 206                |
| 4A <i>QGpc.uhw-4A</i>   | 38.49                | 53.25              | 14.76                 | 112                |
| 4B <i>QGpc.uhw-4B</i>   | 28.83                | 29.70              | 0.86                  | 5                  |
| 5A <i>QGpc.uhw-5A.1</i> | 33.43                | 187.85             | 154.42                | 653                |
| 5A <i>QGpc.uhw-5A.2</i> | 568.67               | 591.69             | 23.02                 | 276                |
| 6A <i>QGpc.uhw-6A</i>   | 535.52               | 583.20             | 47.68                 | 441                |
| 6B <i>QGpc.uhw-6B</i>   | 89.06                | 138.52             | 49.46                 | 286                |
| 7B <i>QGpc.uhw-7B.1</i> | 4.34                 | 5.74               | 1.39                  | 23                 |
| 7B <i>QGpc.uhw-7B.2</i> | 629.25               | 649.71             | 20.46                 | 148                |

**Table 6** Information about selected CG that reside within the intervals of the detected QTLs

| Chr. | QTLs                 | IDs of candidate genes                                               | Annotated function                                                                                                            |
|------|----------------------|----------------------------------------------------------------------|-------------------------------------------------------------------------------------------------------------------------------|
| 1A   | <i>QGpc.uhw-1A</i>   | TRIDC1AG048050                                                       | Sulfite reductase [NADPH] hemoprotein beta-component                                                                          |
| 1B   | <i>QGpc.uhw-1B</i>   | TRIDC1BG066150<br>TRIDC1BG066600                                     | glutamate receptor 3.4<br>Bifunctional inhibitor/lipid-transfer protein/seed storage 2S albumin superfamily protein           |
| 2A   | <i>QGpc.uhw-2A</i>   | TRIDC2AG045010<br>TRIDC2AG047900                                     | Protein NRT1/ PTR FAMILY 4.3<br>Protein NRT1/ PTR FAMILY 6.4                                                                  |
| 3A   | <i>QGpc.uhw-3A</i>   | TRIDC3AG040540                                                       | Protein NRT1/ PTR FAMILY 4.3                                                                                                  |
| 4A   | <i>QGpc.uhw-4A</i>   | TRIDC4AG007090<br>TRIDC4AG007800                                     | Protein transport protein GOT1<br>Protein transport protein Sec61 subunit alpha                                               |
| 4B   | <i>QGpc.uhw-4B</i>   | TRIDC4BG006760                                                       | SCARECROW-like 21                                                                                                             |
| 5A   | <i>QGpc.uhw-5A.1</i> | TRIDC5AG007510<br>TRIDC5AG008560<br>TRIDC5AG005810<br>TRIDC5AG008600 | Protein NRT1/ PTR FAMILY 8.3<br>Protein NRT1/ PTR FAMILY 4.6<br>Protein NRT1/ PTR FAMILY 2.11<br>Protein NRT1/ PTR FAMILY 4.6 |
| 5A   | <i>QGpc.uhw-5A.2</i> | TRIDC5AG056650                                                       | Protein NRT1/ PTR FAMILY 4.5                                                                                                  |
| 6A   | <i>QGpc.uhw-6A</i>   | TRIDC6AG048910<br>TRIDC6AG049880                                     | nitrate reductase 1<br>nitrite reductase 1                                                                                    |
| 6B   | <i>QGpc.uhw-6B</i>   | TRIDC6BG019590                                                       | NAC domain protein (Gpc-B1)                                                                                                   |
| 7B   | <i>QGpc.uhw-7B.1</i> | TRIDC7BG000760<br>TRIDC7BG001030                                     | oligopeptide transporter 4<br>Nucleotide/sugar transporter family protein                                                     |
| 7B   | <i>QGpc.uhw-7B.2</i> | TRIDC7BG057940<br>TRIDC7BG058370                                     | Protein NRT1/ PTR FAMILY 5.1<br>amino acid transporter 1                                                                      |

## Figure legends

**Figure 1.** High-density genetic map of S×Y RIL population and 1.5 LOD support intervals of GPC QTLs detected under five environments.

**Figure 2.** Distribution of GPC in S×Y RIL population. The violin plots show the distribution of GPC in wheat grains measured across five environments: open fields at Ein-Tamar and Kimaron (ET, K\_WL, and K\_WW) and green-house at Sharona (S\_WL and S\_WW). Suffixes WL and WW designate well-watered and water-limited conditions.

**Figure 3.** Physical intervals of GPC QTLs identified in S×Y (blue) and L×G (red) RIL populations. Co-localization of physical interval marked by diagonal lines; potential homoeologous QTLs are connected by green double arrow.

## **Supporting Material**

**Table S1.** Genetic and physical positions of the mapped SNPs

**Table S2.** List of High Confidence genes within QTL intervals and their homoeologs

**Table S3.** Summary of CGs

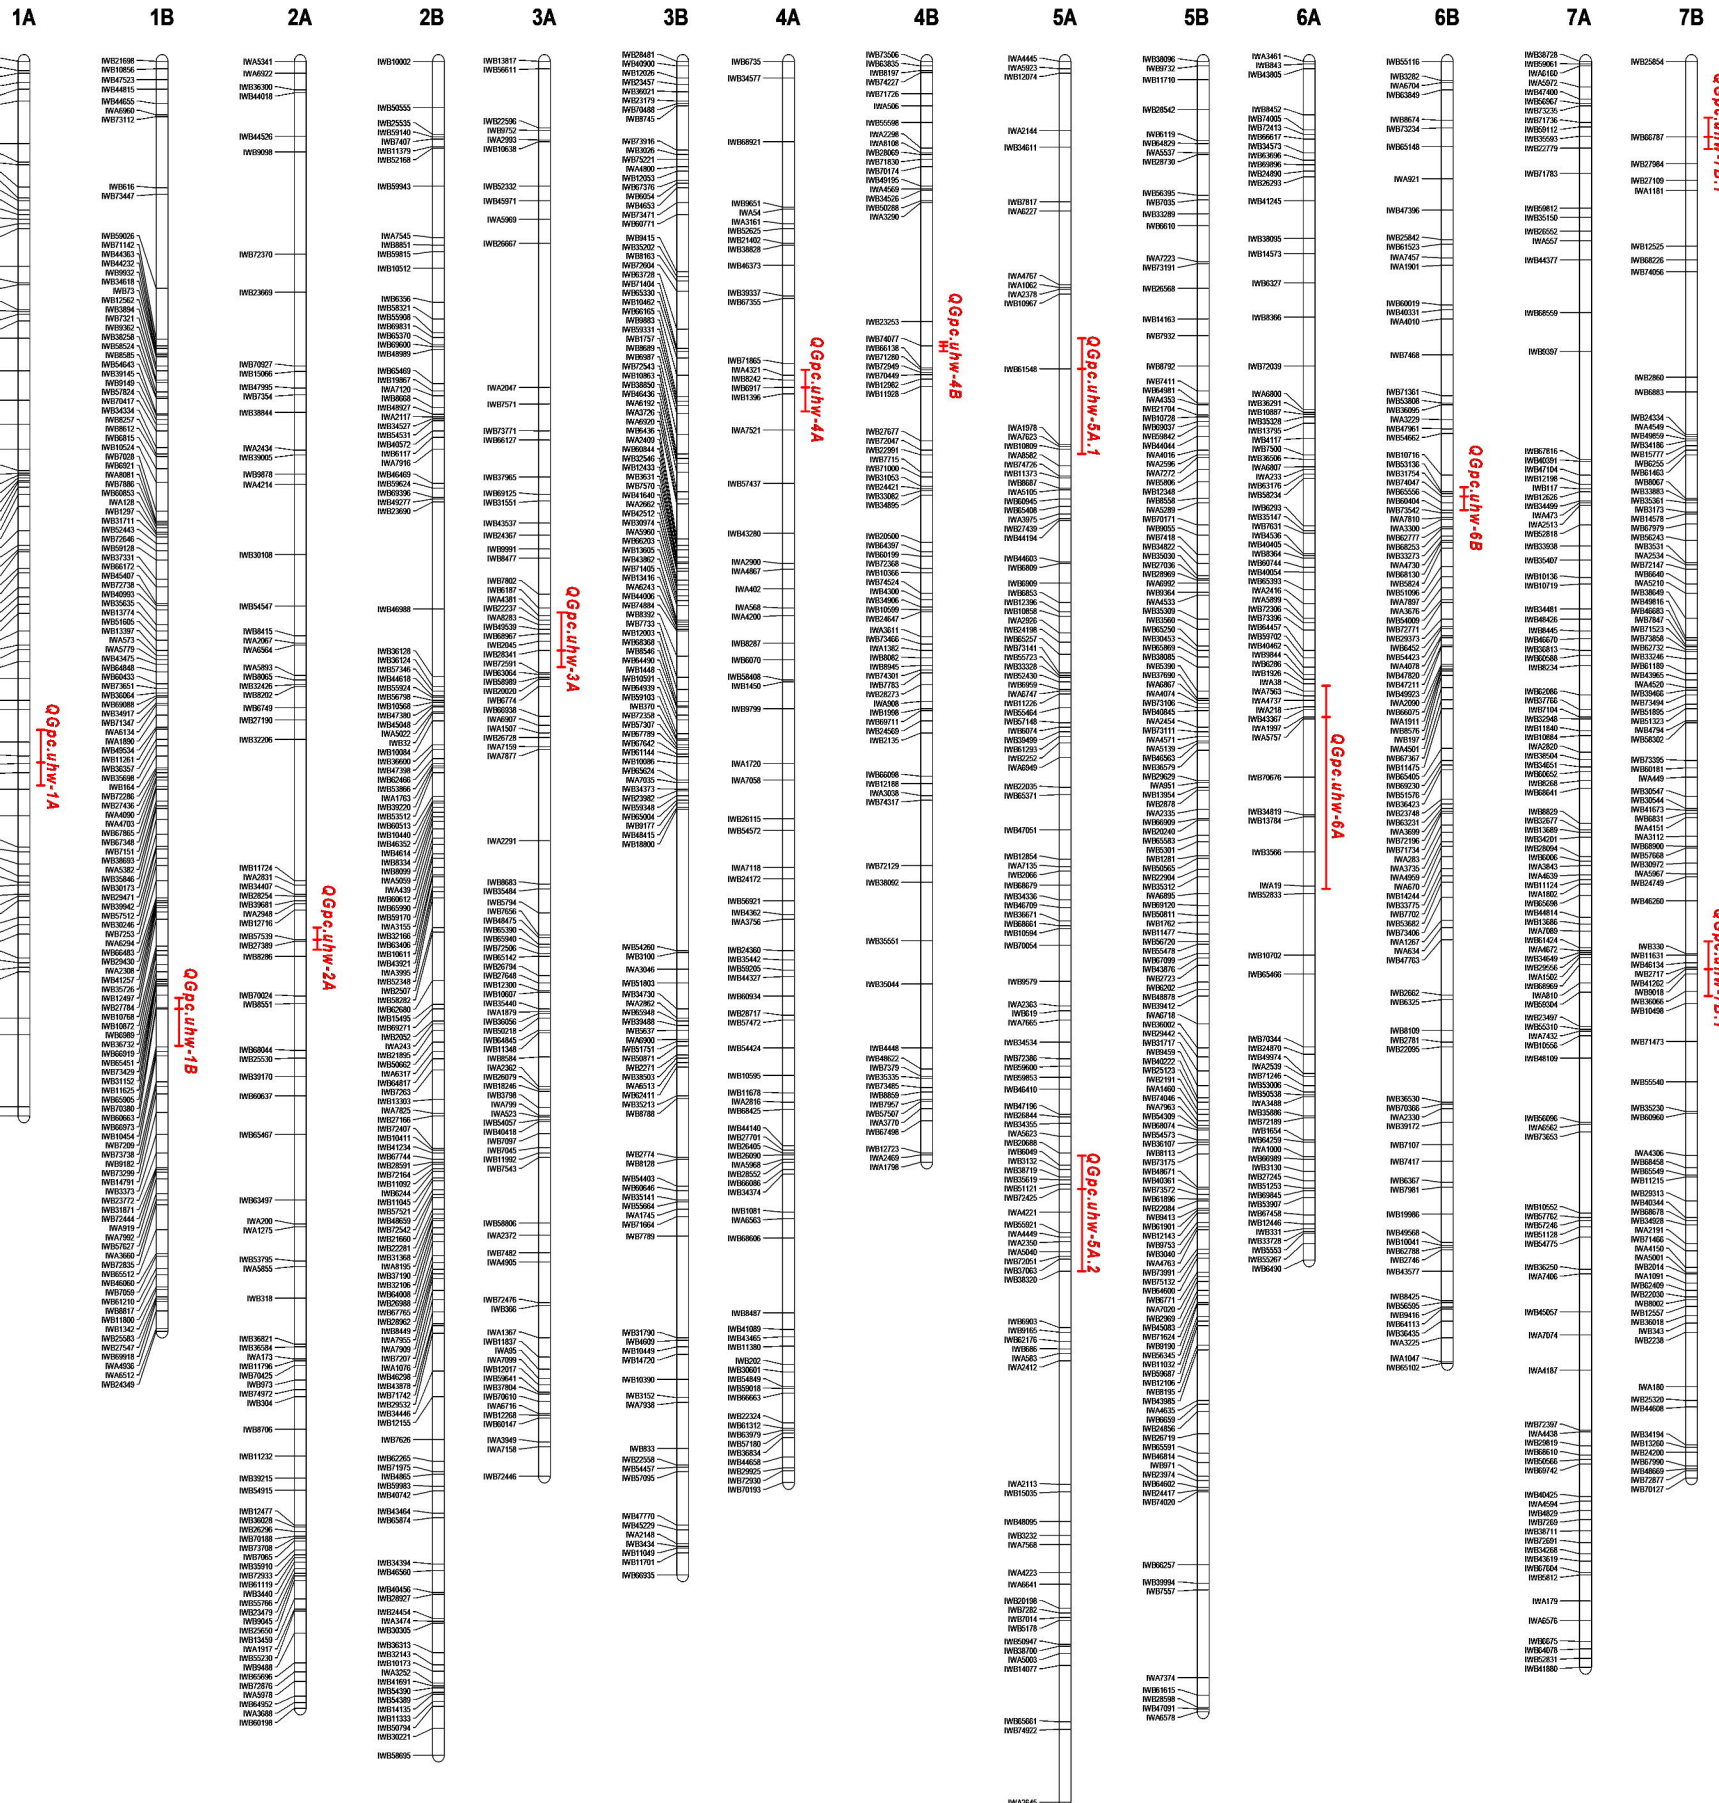

1A

1B

2A

2B

3A

3B

4A

4B

5A

5B

6A

6B

7A

7B

QGc-uhw-7A

QGc-uhw-7B

QGc-uhw-7C

QGc-uhw-7D

QGc-uhw-7E

QGc-uhw-7F

QGc-uhw-7G

QGc-uhw-7H

QGc-uhw-7I

QGc-uhw-7J

QGc-uhw-7K

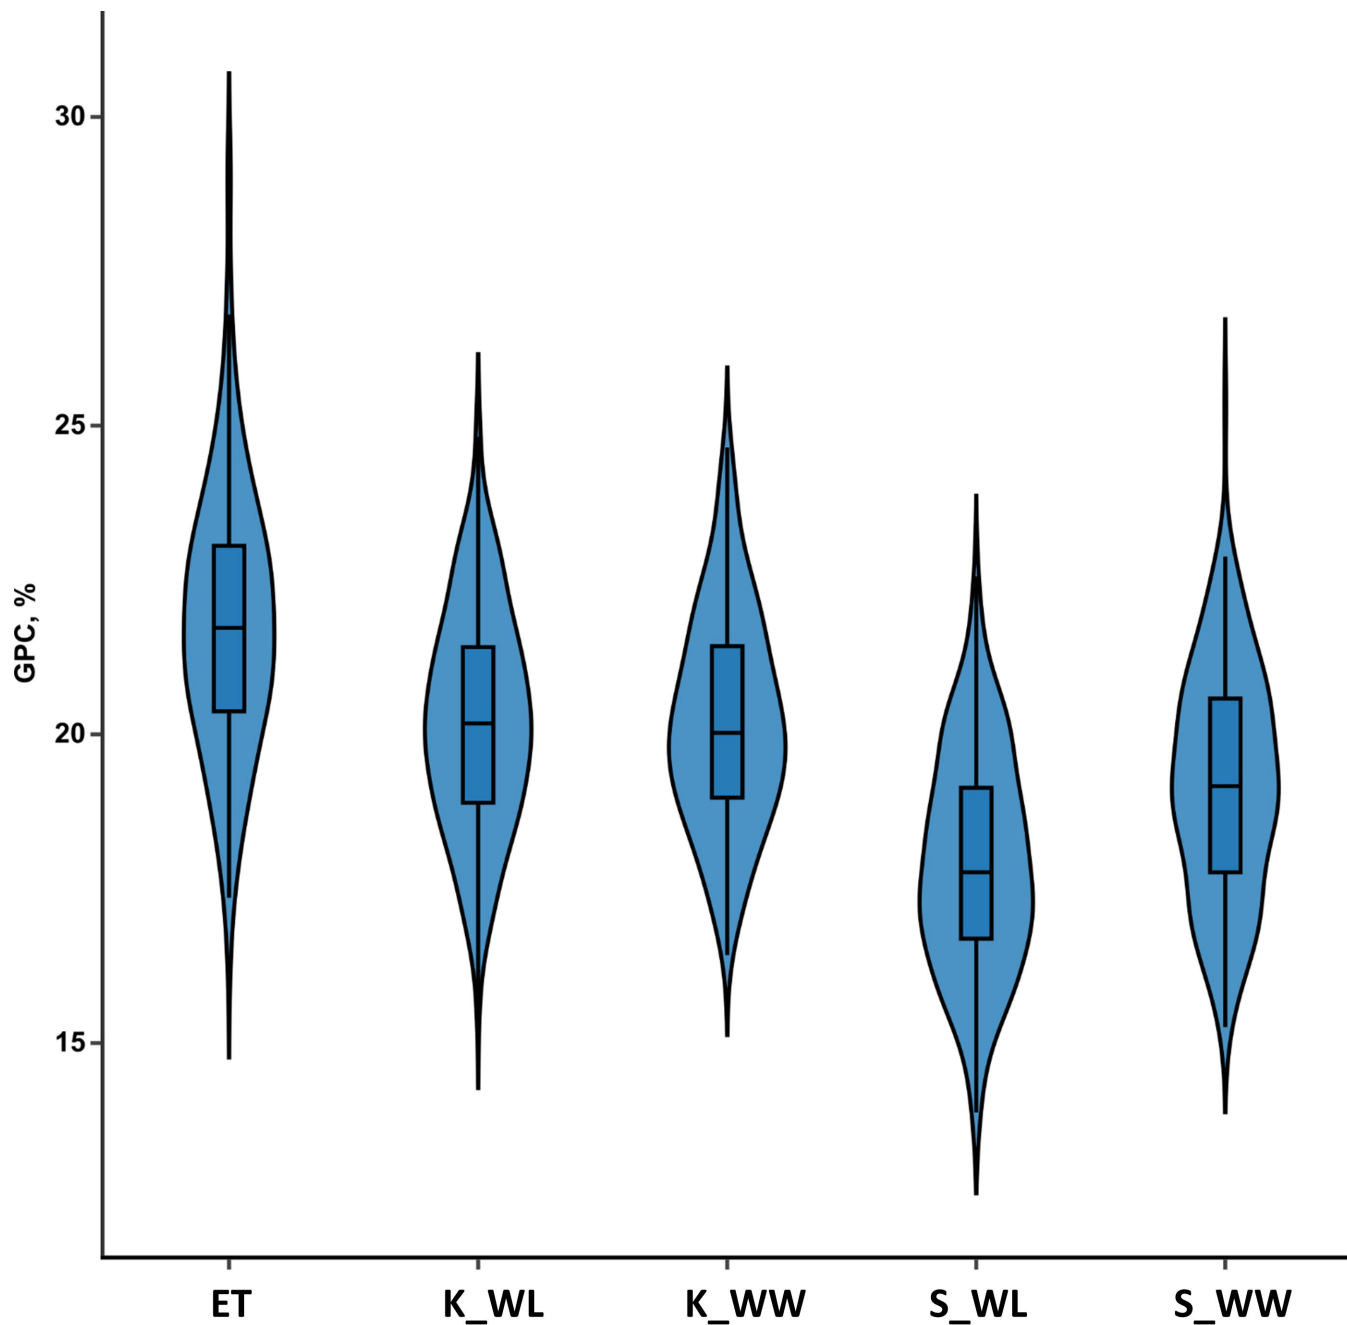

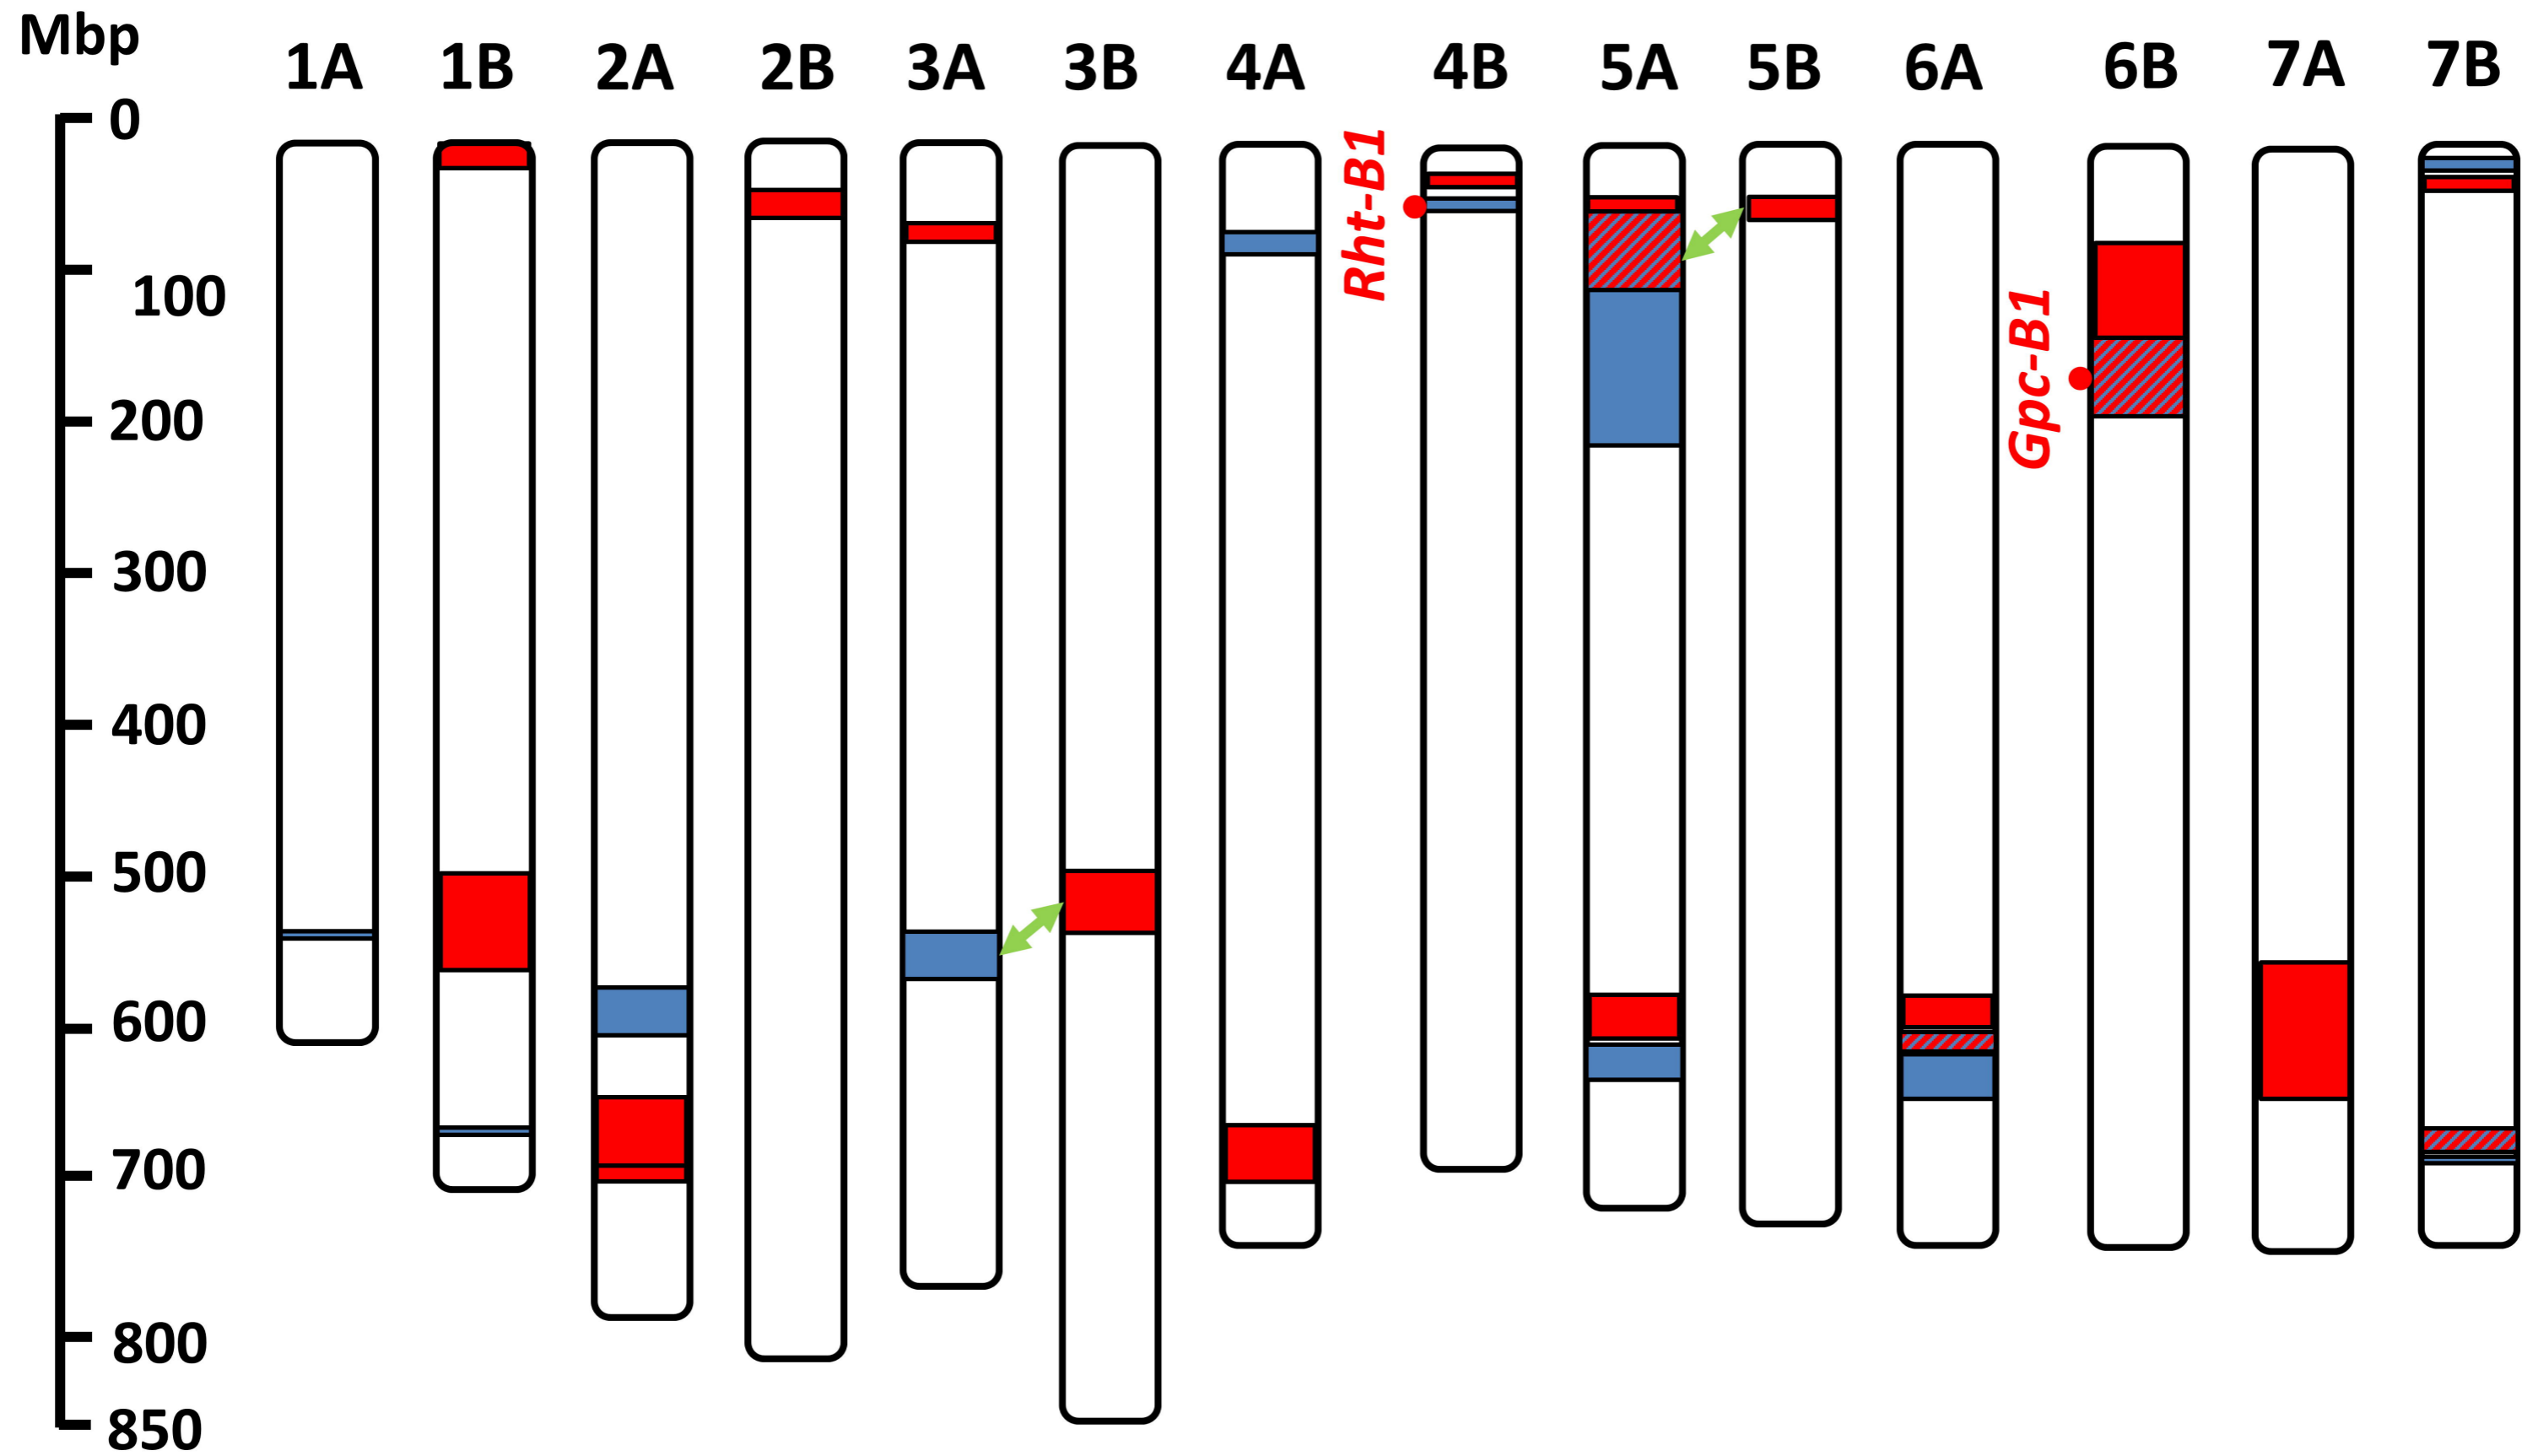

Source: https://www.biorxiv.org/content/biorxiv/early/2019/04/07/601773.full.pdf
